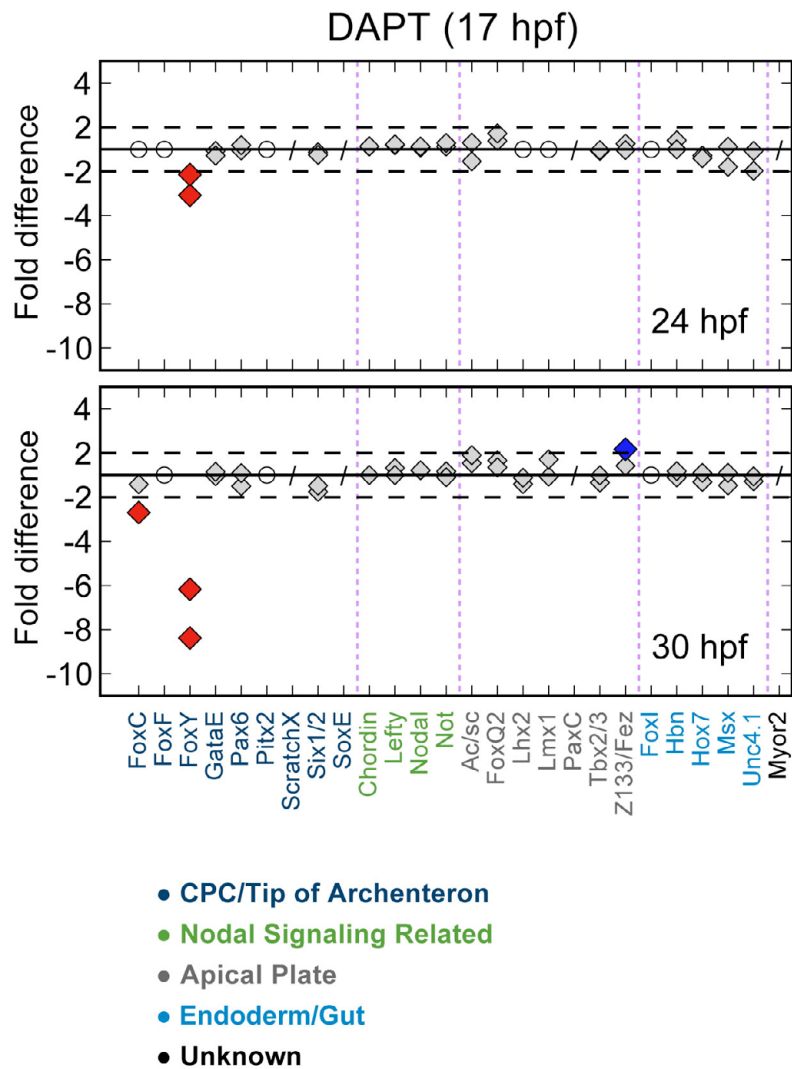

**Fig. S1. Effects of Delta/Notch perturbations on transcript levels at 24 hpf and 30 hpf for the same selection of genes as shown in Fig. 2.** DAPT treatment at 17 hpf causes strong and consistent depletion of only *foxY* among the 182 genes included in this dataset. The data are reformatted from Materna and Davidson (Materna and Davidson, 2012). Each diamond represents a single experiment; red indicates a significant reduction, blue an increase, and gray no significant change of transcript levels following treatment. Genes not significantly transcribed in experiment and control are marked with an open circle. We estimated transcript levels by comparing our data with prior absolute measurements (Materna et al., 2010). A level of 25 transcripts/embryo was chosen as significant expression. Genes not tested are marked with a solidus. Black dashed lines indicate the threshold for significant changes following perturbation.

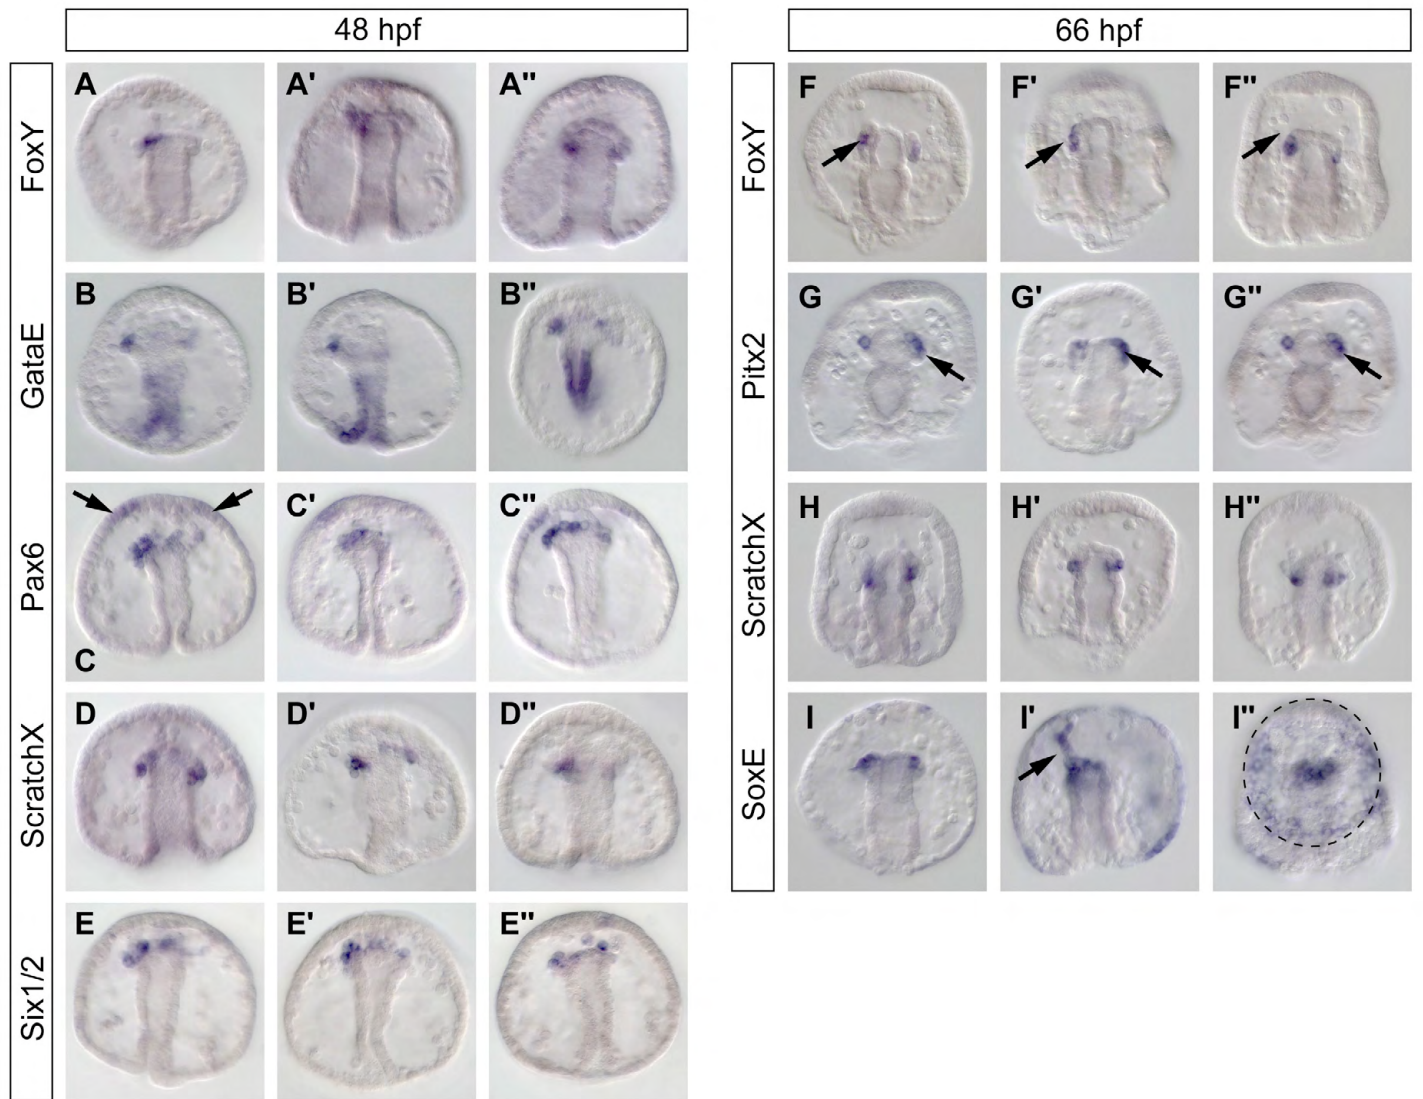

**Fig. S2. Additional spatial expression patterns of genes with a specific coelomic pouch expression compartment.** (A-A'', F-F'') *foxY* expression is biased to the left side at 48 hpf, but becomes restricted to the left side after 66 hpf (arrows in F-F''). (B-B'') *gataE* is expressed in the gut and the coelomic pouches, and is biased to the left side. (C-C'') *pax6* is expressed at the tip of the archenteron, but also in the ectoderm surrounding the apical plate (arrows in C). (D-D'', H-H'') *scratchX* is expressed in both pouches and remains bilaterally expressed until at least 3 dpf. (E-E'') At 48 hpf *six1/2* is expressed at the tip of the archenteron. (G-G'') *pitx2* is preferentially expressed in the right coelomic pouch (arrow). *pitx2* and *foxY* expression patterns are complementary; overlap is minimal at best (compare G-G'' with F-F''). (I-I'') *soxE* is expressed in the coelomic pouches and the water canal as it emerges from the left coelomic pouch (arrow in I'). It has a second expression domain in the ciliated band (dashed line in I'').

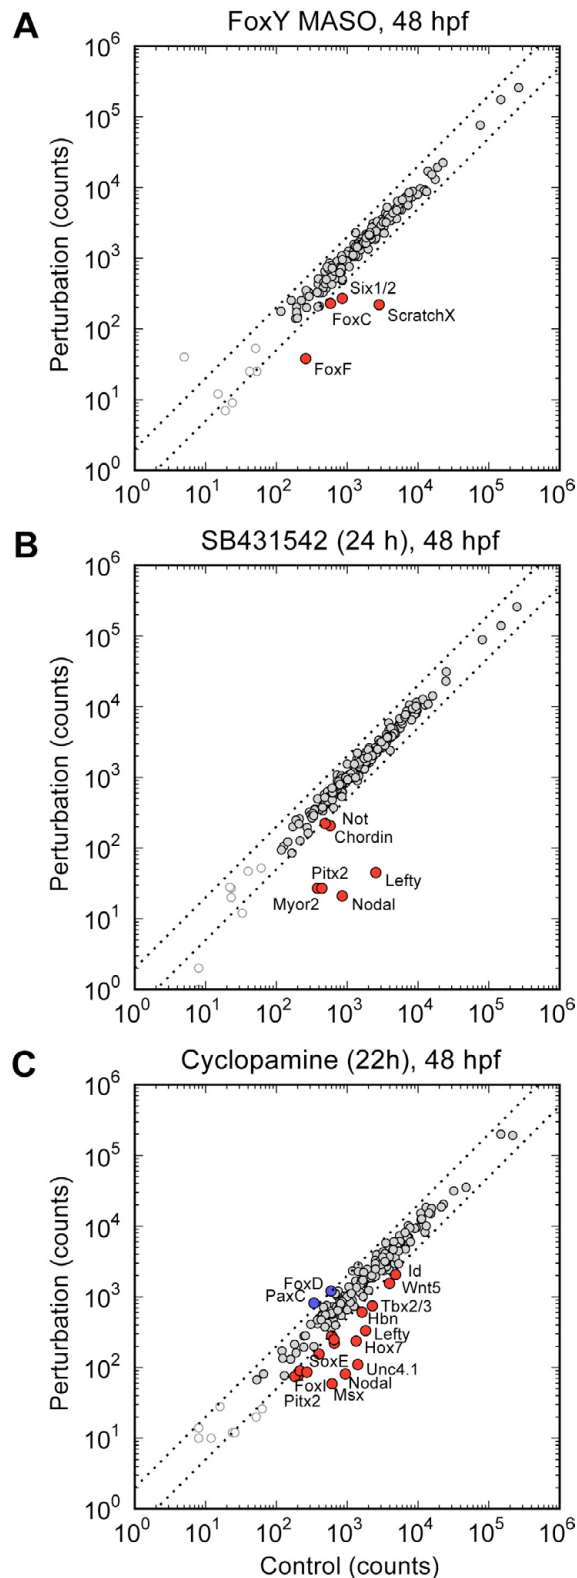

**Fig. S3. Global evaluation of perturbation effects by transcript quantification.** RNA from treated embryos was extracted and quantified using the NanoString nCounter and the resulting counts were normalized. Counts from perturbed embryos were plotted against those of control embryos. **(A)** FoxY MASO injection at fertilization causes depletion of transcript levels for genes specifically expressed in the coelomic pouch progenitors. Out of 205 genes only a few, none of them outside the *foxY* expression compartment, are affected by the perturbation, indicating that the MASO does not cause nonspecific delays in development. **(B)** Nodal perturbation by addition of the inhibitor SB431542 at 24 hpf causes lower transcript levels of only six genes included in the NanoString code set. **(C)** Disruption of Hh by application of cyclopamine has more widespread effects and also causes depletion of several endoderm genes. Labels for some weakly affected genes that were not substantiated in repeat experiments were left out of C for clarity. The dotted lines indicate a threshold of 2-fold change. A red dot indicates significant depletion following treatment, a blue dot a significant increase, and a gray dot indicates no significant change. Genes present with ~25 transcripts or fewer per embryo are marked with an open circle; transcription levels were estimated from prior absolute measurements (Materna et al., 2010).

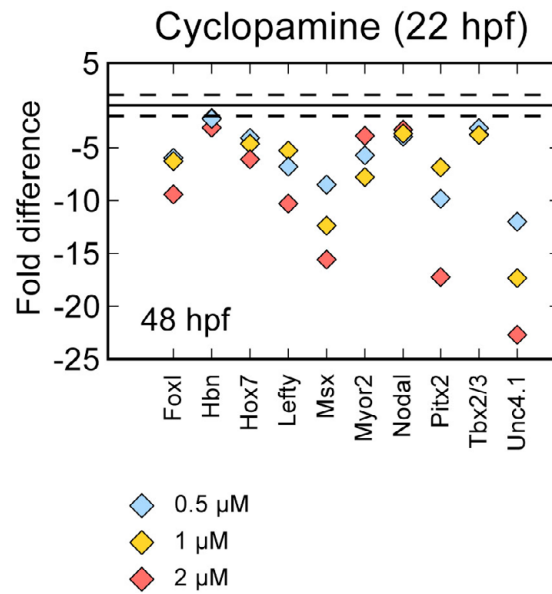

**Fig. S4. Effects of cyclopamine treatment are dose dependent.** Sea urchin embryos from the same batch were treated with the indicated concentrations of cyclopamine to disrupt Hh signaling. RNA was extracted and quantified with the NanoString nCounter and fold differences were calculated between controls (ethanol only) and cyclopamine-treated embryos. This plot shows the genes that are most strongly affected by the perturbation (compare with Fig. 4B and Fig. S3C). In our experiments, cyclopamine concentrations of 5  $\mu$ M and higher caused severe developmental delays and death.

## FoxY Construct #3 upstream region (-778 to ATG/GFP in second exon)

TTCGCAGGCTAGAGACACCTCTCTGCTTAATCCGGAAGCTTAAACAAAGAGCCCTCATTGTCAATGGTGTAGTG  
 TACGAGGC GGATTAATAAATCCAATTAGAAGGGTATCACCAGGCGTGGGAAAAGGAATGGGTCTGACTTGGCTA  
 GTCTTATCATTTCATCATCAGACCGTTTTGAAAACAATCCATAATAGATTAGAGTCAATAAATTAGACAGATGA  
 TAAAATGGGTCTTGATTTGCTATAGATCGTTGGCATAACCCATGCATTGGGTATGATGTCTTTTAAGCCATTTCG  
 AACAAAACACTATATATGCAATCATGCACAATCTGATTTCTTCTTCTCTGTCTTTCTCTCCATGCCCCCTCCC  
 GCCCCCC CCCCCTCTCTCTCTCTCTCTCTATCTCAGAGAGTTTCTGTCTCTATATAGAACTCTCTAGACATTA  
 TTTGAAACTTCTATGATTGTACAATATGCGTTTGGACAATTGTCATGTTTGTGAATTTTGAGTATCATTTTTAT  
 ATGAGAGTGTATTTTTGTTGATCGACGGTATGATTGAAAAAGATCAACTTGGTCTGATTTCAAAGACTACCATA  
 TAGAAAAAGATTGTTTCGCGCATGCGTCGCCCTGATCCTTTCTTTTCGCATCTCGATTACGTAACACCTCGCTCTC  
 CTGTAATTGGCTTAGAGTTGGTAAGAACGGTGAGAACAGATCAGGTATAAAGTAAGATAGAAGTCCGATGAAGA  
 AGCTTATCTTGCTCAAGACCTCTGAACTGGAAACATTGCTGCAC T GACTCTGCCTACATACCCAGCTTCACAAA  
 TCTCGCCTCATCGATTGCCTTACTCCTCATTTTCCATACCATTTGTAGGTGAGTATCTCACGTTAAATTGTAAT  
 ATTATCTGTCGTAATAATGATTTGACTCCATTTCTGTAGTACTCGTGGTGAATTAAGTGTGGAGCGAATGTT  
 AGTCTTGTGGTTGAATGGTGACTTGCCTTGTCTTCTTATCGATGAGAGGGGAATTCGTGTGAAGGGTTTTTA  
 AATTACAGATGCCAATATCCAATATCAGTTCAGCTAACATCCAGTAAAACCAGTAATATACAATATACAAAC  
 ATATCTCATCAATTTCTTTAATATGTTCAATTAGGCATGTAAATTACTCAGGGAACATCTATAGTATATAGGCC  
 TACTTCGGAATATTCTTTTGTCTTCTTGATTATGAACCATTCTGGCCAGAAAGATATACGGCTAGGCCAGAGC  
 ATGATCAGGTATATTTTGTCTGTTATACGTGAGCTTTGAGTGTCTACATAATATATGTATATTCTTTGTAA  
 ATATTTTTCGCTGGAATTCGTTTGCCTTAAATGATTATATTAGTGTGGTTTTATGAATGTCTATACAATCGA  
 TACCTTTTATGATTGTTATTCATGAATCAAAGATGAAATAAAGAAGGAAAAAATGAACCCGTTGTTTTCCGGA  
 GATGTGGGAGGTAAATTTATGACCAAAATCTACTTGTCTTTTTTTTCACTTTTTCATGAATAGTGTCTGCACTT  
 GGAGCCATGAGCAAGGGCGAGGAAGTTCCTGCTGCG...

- Pitx2 binding sites
- Start of Construct #4
- Su(H) binding sites
- Exon
- Splice Site
- Start codon
- GFP sequence

**Fig. S5. Annotated sequence of the regulatory region upstream of the *foxY* transcription start site.** This sequence corresponds to the region contained in Construct 3; Construct 4 is nested within, starting at position 379 (marked in blue). 5'-(C/T)(A/G)TG(A/G)GA(A/G/T)-3' was used to identify candidate Su(H) sites (Ransick and Davidson, 2006). The TG at positions 3 and 4, and the GA at positions 6 and 7, were mutated to CA and AG. We used the sequence 5'-GGATTA-3' to identify candidate Pitx2 target sites, and mutated 5'-GATT-3' to 5'-AGCC-3'.

**Table S1. Primers for WMISH templates and QPCR**

| Gene            | Forward primer               | Reverse primer                     | Use            | Accession No.  |
|-----------------|------------------------------|------------------------------------|----------------|----------------|
| <i>eya</i>      | GTATTGGAAGAGGGCGTCAA         | AGGAGGGGTGGATAGCATCT               | WMISH template | SPU_013869     |
| <i>foxY</i>     | ACTGGATGATCAACCAAGC          | AGAAACCTTTGGTGGTGTCC               | WMISH template | AF517552.1     |
| <i>foxY</i>     | TGCACTGCACTGACTCTGC          | CTTTCCATTCCGTGGTGAAG               | QPCR           | AF517552.1     |
| <i>gataC</i>    | GCTGGAGTAGCAAGCAGTCAAG       | TGTTACCCATTACCCCAGGATG             | WMISH template | NM_214539.1    |
| <i>gataE</i>    | TCTTACCCATCAGCCAGGAC         | TCGAGTGGAACAATGGAACA               | WMISH template | NM_001005725.1 |
| <i>hmg1</i>     | GGACCGAGACAGTTCAAAGC         | CTTCTCCTCCAGAGCCTTCC               | QPCR           | SPU_027981     |
| <i>lefty</i>    | GAACTTCATACGACAAACATCTCCTGGC | TTTCGATTATATCATATTATTGCATTTTATTATG | WMISH template | SPU_009911     |
| <i>nanos</i>    | GCAAGAACAACGGAGAGAGC         | CCGCATAATGGACAGGTGTA               | QPCR           | DQ286228.1     |
| <i>nodal</i>    | CACAAAGTGTGTTTGTGCAAG        | GTCGATGAAATTGAAAATATCATGA          | WMISH template | NM_001098449.1 |
| <i>not</i>      | ACGATTTGGAGGGTTTTAAGC        | GCAACTTACCCGTCATCACC               | WMISH template | NM_214562.1    |
| <i>pax6</i>     | GACAGTGTTCATCATCGTGGTG       | ACCTCGCGAGAGAAAATCAA               | WMISH template | SPU_006786     |
| <i>pitx2</i>    | ATCCCAAATTTCCCGTCTTC         | TTGGTGGTGTCTCATGTGGT               | WMISH template | SPU_004559     |
| <i>scratchX</i> | CGGCCTAACAAGGAGAAAGC         | ACGGTTTAATGGTGGAGTGC               | WMISH template | SPU_15640      |
| <i>six1/2</i>   | TGAAACACCGTCAAAACAAGG        | AACTTGTGTCTGGTTCAGTCC              | WMISH template | SPU_017379     |
| <i>soxE</i>     | GGAGTAGCCCAAGAACACCA         | TGACTGTACCTGCCAAGGAG               | WMISH template | SPU_016881     |
| <i>ubq</i>      | CACAGGCAAGACCATCACAC         | GAGAGAGTGCGACCATCCTC               | QPCR           | SPU_021496     |
